# Supplementary material for: NADH gene manipulation for advancing bioelectricity in Clostridium ljungdahlii microbial fuel cells
Source: Royal Society of Chemistry journal article supplement (doi:10.1039/c5gc02696b), 2015-12-18
Supplement: c5gc02696b1.pdf [file c5gc02696b1.pdf]

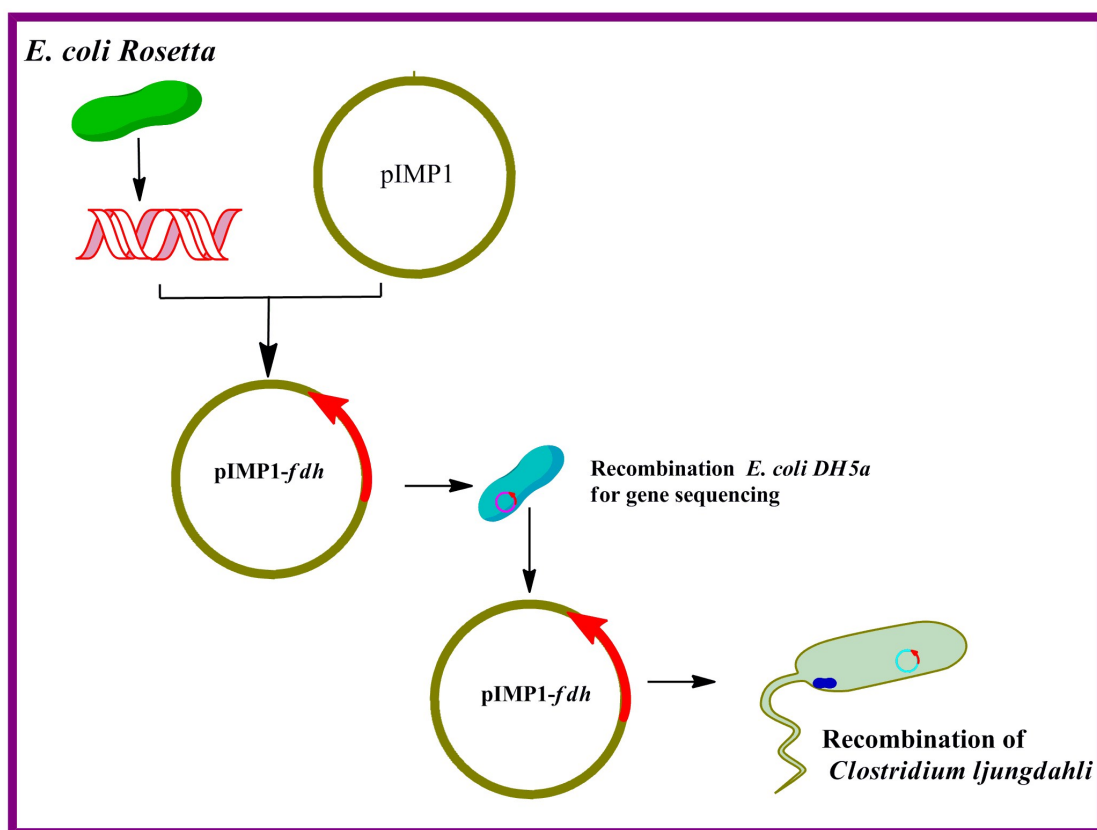

Fig.S1 Genetic engineering strain construction process.

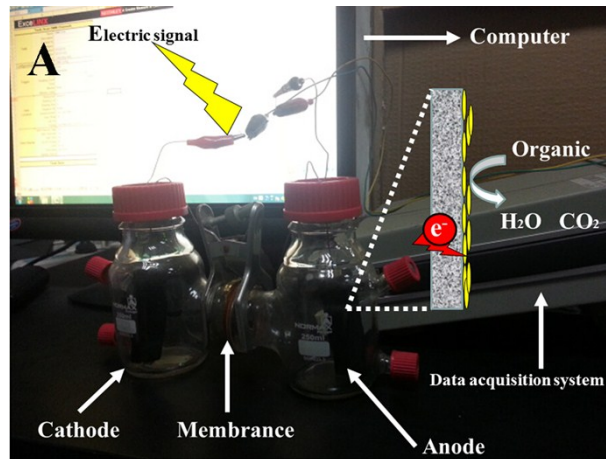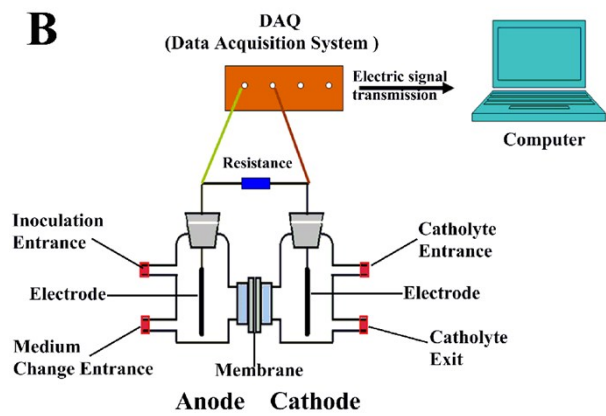

Fig.S2 (A) The real picture of the experimental set up. (B) Schematic diagram of the microbial fuel cell.

**Table S1 Comparison of electricity production different Clostridium species**

|                                 | <b>Voltage (mV)</b> | <b>Power density (mW·m<sup>-2</sup>)</b> | <b>Reference</b> |
|---------------------------------|---------------------|------------------------------------------|------------------|
| <i>C. propionicum</i>           | 106                 | 21.8                                     | Zhu (2011)       |
| <i>C. acetobutylicum</i>        | 140                 | ---                                      | Amethist (2011)  |
| <i>C. thermohydrosulfuricum</i> | 79.2                | ---                                      | Abhilasha (2009) |

**Table S2 Bacterial strains and plasmids**

| strains and plasmids                        | Significant characteristics                                            | Source or reference |
|---------------------------------------------|------------------------------------------------------------------------|---------------------|
| Plasmids                                    |                                                                        |                     |
| pIMP1                                       | 4605 bp; Ap <sup>r</sup>                                               | [ represents]       |
| pIMP1- <i>fdh</i>                           | 6711 bp; Ap <sup>r</sup><br>pIMP1 cloned with 2106 bp <i>fdh</i> gene, | This study          |
| Bacterial strains                           |                                                                        |                     |
| <i>Clostridium ljungdahlii</i>              | Host bacteria                                                          | ATCC                |
| <i>Clostridium ljungdahlii</i> - <i>fdh</i> | Recombinant strain harboring pIMP1- <i>fdh</i>                         | This study          |
| <i>E. coli</i> Rosetta                      | Source of the <i>fdh</i> gene                                          | This study          |
| <i>E. coli</i> DH5α                         | Plasmid validation                                                     | This study          |

Note: Ap<sup>r</sup>, ampicillin resistance gene;

**Table S3 Medium for *Clostridium ljungdahlii***

| <i>Main constituent</i>        | <i>Concentration (per liter)</i> |
|--------------------------------|----------------------------------|
| <b>Proteose peptone</b>        | <b>10 g</b>                      |
| <b>Beef extract</b>            | <b>10 g</b>                      |
| <b>Yeast extract</b>           | <b>3 g</b>                       |
| <b>Cysteine-HCl</b>            | <b>0.5 g</b>                     |
| <b>Salt solution</b>           | <b>50 mL</b>                     |
| <b>Trace element solutions</b> | <b>10 mL</b>                     |
| <b>Deionized water</b>         | <b>940 mL</b>                    |

**Table S4 Salt solution**

| <i>Main constituent</i>                   | <i>Concentration (per liter)</i> |
|-------------------------------------------|----------------------------------|
| <b>NH<sub>4</sub>Cl</b>                   | <b>20 g</b>                      |
| <b>KCl</b>                                | <b>2 g</b>                       |
| <b>MgSO<sub>4</sub> • 7H<sub>2</sub>O</b> | <b>4 g</b>                       |
| <b>NaCl</b>                               | <b>16 g</b>                      |
| <b>KH<sub>2</sub>PO<sub>4</sub></b>       | <b>2 g</b>                       |
| <b>CaCl<sub>2</sub></b>                   | <b>0.4 mL</b>                    |

**Table S5 Trace element solutions**

| <i>Main constituent</i>                              | <i>Concentration (per liter)</i> |
|------------------------------------------------------|----------------------------------|
| Nitrilotriacetic acid                                | 2 g                              |
| MnCl <sub>2</sub> • 4H <sub>2</sub> O                | 1.3 g                            |
| CoCl <sub>2</sub> • 6H <sub>2</sub> O                | 0.4 g                            |
| FeSO <sub>4</sub> • 7H <sub>2</sub> O                | 0.2 g                            |
| ZnSO <sub>4</sub> • 7H <sub>2</sub> O                | 0.2 g                            |
| CuCl <sub>2</sub> • 2H <sub>2</sub> O                | 0.02 g                           |
| NiCl <sub>2</sub> • 6H <sub>2</sub> O                | 0.02 g                           |
| Na <sub>2</sub> MoO <sub>4</sub> • 2H <sub>2</sub> O | 0.02 g                           |
| Na <sub>2</sub> SeO <sub>3</sub>                     | 0.02 g                           |
| Na <sub>2</sub> WO <sub>4</sub> • 2H <sub>2</sub> O  | 0.025 g                          |
